# Supplementary material
Source: PubMed Central journal article supplement (PMC3137903)
Supplement: NIHMS293766-supplement-1.pdf [file NIHMS293766-supplement-1.pdf]

**SUPPLEMENTAL DATA****SUPPLEMENTAL TABLE S1.**

Supplemental Table S1: Transfection efficiency of siLentFect in pancreatic cancer cell lines.

|           | SLF 2:1 |        | SLF 4:1 |        | SLF 6:1 |        | SLF 8:1 |        | SLF 10:1 |        |
|-----------|---------|--------|---------|--------|---------|--------|---------|--------|----------|--------|
|           | NS      | Lethal | NS      | Lethal | NS      | Lethal | NS      | Lethal | NS       | Lethal |
| BxPC3     | 84.3    | 3.7    | 82.2    | 8.0    | 76.0    | 1.0    | 66.5    | 3.8    | 54.6     | 0.6    |
| MiaPaCa-2 | 91.5    | 17.3   | 90.0    | 8.8    | 91.9    | 7.2    | 100.6   | 6.6    | 97.9     | 6.1    |
| Panc-1    | 83.7    | 6.2    | 85.6    | 5.9    | 69.1    | 1.7    | 78.1    | 2.2    | 71.2     | 1.5    |
| AsPC-1    | 94.1    | 5.8    | 94.7    | 6.1    | 80.9    | 1.9    | 84.3    | 2.2    | 75.0     | 2.0    |
| Su.86.86  | 92.9    | 36.5   | 96.0    | 19.8   | 91.9    | 9.8    | 90.2    | 4.0    | 79.1     | 1.7    |

**SUPPLEMENTAL TABLE S1. Transfection efficiency of siLentFect in pancreatic cancer cell lines.** In order to determine transfection efficiency, cells were reverse transfected with non-silencing (NS) or lethal control siRNA and incubated for 96 hours. Values shown are percent viability of buffer-treated wells. Higher amounts of transfection reagent often decreases cellular viability, so we chose the ratio used for each cell line (highlighted in red) based on the value that demonstrated a minimum decrease in viability with NS siRNA and a greater than 90% decrease in viability with lethal siRNA.

## SUPPLEMENTAL TABLE S2:

**Supplemental Table 2. Z-score values of hits from siRNA screening of kinases**

| siRNA       | MiaPaCa2_1 | MiaPaCa2_2 | BxPC3_1 | BxPC3_2 | Norm_Fibro_1 | Norm_Fibro_2 |
|-------------|------------|------------|---------|---------|--------------|--------------|
| PLK1_A      | -4.939     | -5.008     | -5.058  | -7.319  | -2.583       | -2.871       |
| CALM1_B     | -3.640     | -8.022     | -5.700  | -4.278  | 0.626        | 0.214        |
| PRKCL1_B    | -4.990     | -6.798     | -5.176  | -4.225  | -1.113       | -1.515       |
| TNK1_B      | -4.379     | -6.003     | -1.009  | -1.652  | -1.366       | -0.148       |
| GRK4_B      | -3.036     | -4.001     | -3.861  | -3.920  | -1.010       | -0.916       |
| MAPK11_A    | -3.048     | -5.367     | -3.119  | -3.385  | -1.581       | -0.581       |
| PLK1_B      | -3.195     | -5.557     | -4.264  | -3.582  | -0.694       | -1.421       |
| PTK9_B      | -2.577     | -6.457     | -3.791  | -1.780  | 0.213        | -0.496       |
| AKAP3_B     | -3.182     | -4.601     | -3.228  | -1.490  | -1.082       | -1.125       |
| TNK2_B      | -3.121     | -5.639     | -3.236  | -1.176  | -1.305       | -1.365       |
| CAMK1D_A    | -2.391     | -1.362     | -3.493  | -5.626  | -1.757       | -2.257       |
| CB3_B       | -2.983     | -3.325     | -3.620  | -1.656  | -2.486       | -1.917       |
| EPHA5_B     | -2.123     | -1.403     | -2.245  | -2.374  | -3.441       | -3.351       |
| MAPK12_A    | -1.743     | -1.668     | -2.753  | -1.596  | -3.581       | -3.191       |
| UCK1_B      | -2.072     | -0.923     | -2.891  | -3.193  | -2.178       | -2.065       |
| FLJ11149_A  | -1.715     | -2.327     | -2.264  | -2.038  | -1.415       | -1.701       |
| MAP4K1_A    | -2.254     | -2.165     | -1.672  | -1.806  | -2.653       | -2.670       |
| DAPK2_A     | -2.306     | -1.220     | -2.113  | -1.692  | -2.179       | -2.698       |
| MAP4K2_A    | -2.456     | -1.564     | -2.295  | -2.212  | -1.796       | -1.894       |
| CDK5R2_A    | -3.316     | -3.873     | -1.976  | -2.440  | -0.061       | -0.271       |
| FLT4_B      | -3.393     | -3.006     | -2.514  | -2.632  | 1.298        | 1.223        |
| PRKCL1_A    | -1.824     | -1.685     | -1.905  | -1.037  | 0.227        | 0.907        |
| EPHA4_B     | -2.461     | -1.790     | -1.816  | -0.553  | -0.823       | -0.150       |
| PTK9L_B     | -1.811     | -2.891     | -2.133  | 0.177   | -0.712       | -0.707       |
| MAP2K1IP1_B | -2.747     | -1.811     | -4.138  | -2.666  | -0.879       | -1.187       |
| PLK3_A      | -1.974     | -0.904     | -4.716  | -3.587  | -1.064       | -0.742       |
| ROR2_A      | -2.147     | -0.722     | -4.209  | -2.896  | -0.250       | -0.704       |
| PRKY_B      | -1.834     | -1.002     | -1.882  | -2.620  | -0.910       | -0.794       |
| AKAP9_A     | -1.943     | -2.830     | -2.486  | -3.327  | -0.427       | -0.558       |
| STK10_A     | -0.586     | -2.075     | -3.102  | -2.255  | -0.376       | -0.458       |
| TAOK3_B     | -2.242     | -2.927     | -3.418  | -1.653  | -0.881       | -0.819       |
| NEK3_A      | -2.132     | -2.315     | -3.323  | -1.942  | -0.068       | -0.438       |

**SUPPLEMENTAL TABLE S2. Z-score values of hits from siRNA screening of kinase.** Cell viability data from each screen was normalized by z-score analysis for comparison. Hits had a cutoff of -1.65 for at least three of the four screens of MiaPaCa-2 and BxPC-3 cells. Z-score data for a normal fibroblast cell line is shown for comparison.

SUPPLEMENTAL FIGURE S1:

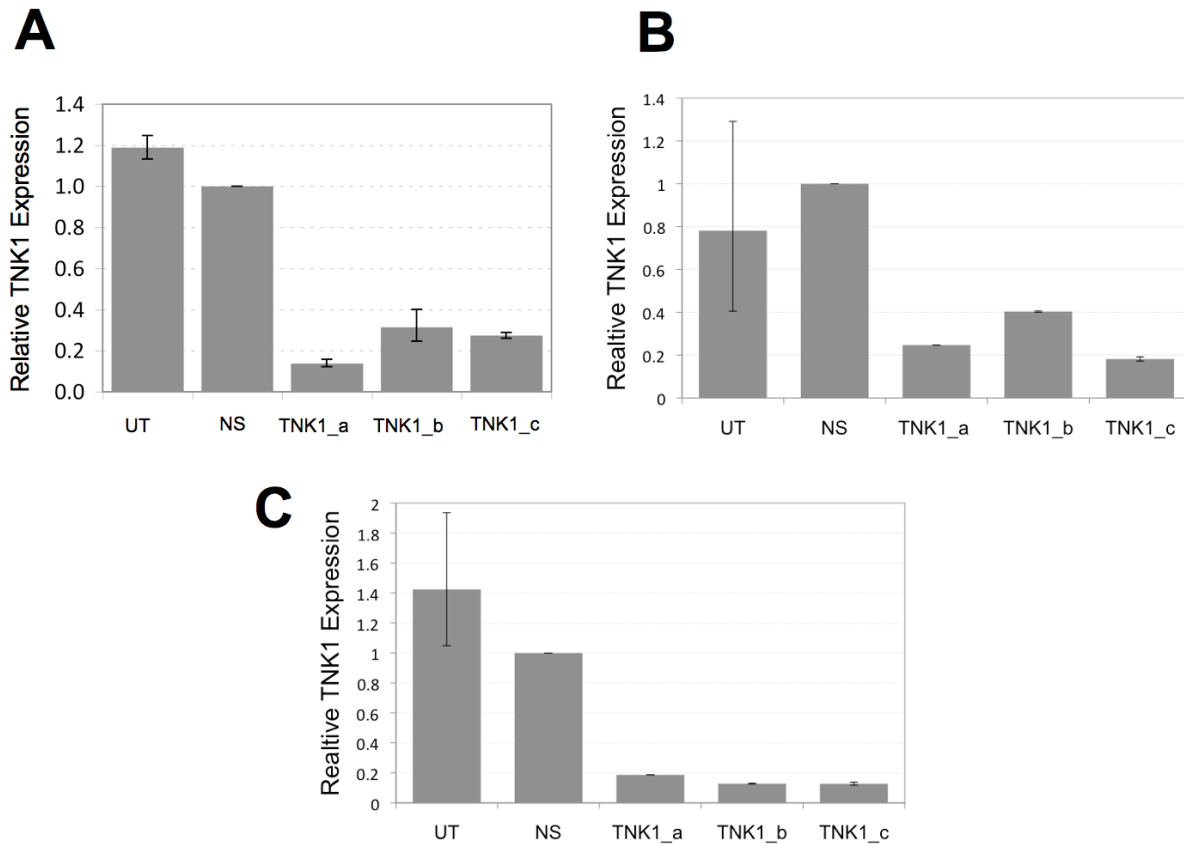

**SUPPLEMENTAL FIGURE S1. Confirmation of TNK1 knockdown in pancreatic cancer cell lines.** Pancreatic cancer cell lines (A) MiaPaCa-2, (B) AsPC-1 and (C) Su.86.86 were incubated with siRNA sequences against TNK1, negative control non-silencing siRNA (NS) or left untreated (UT) and allowed to grow for 48 hours. RNA was isolated and expression of TNK1 was determined by qRT-PCR analysis. All samples were normalized against GAPDH.

SUPPLEMENTAL FIGURE S2:

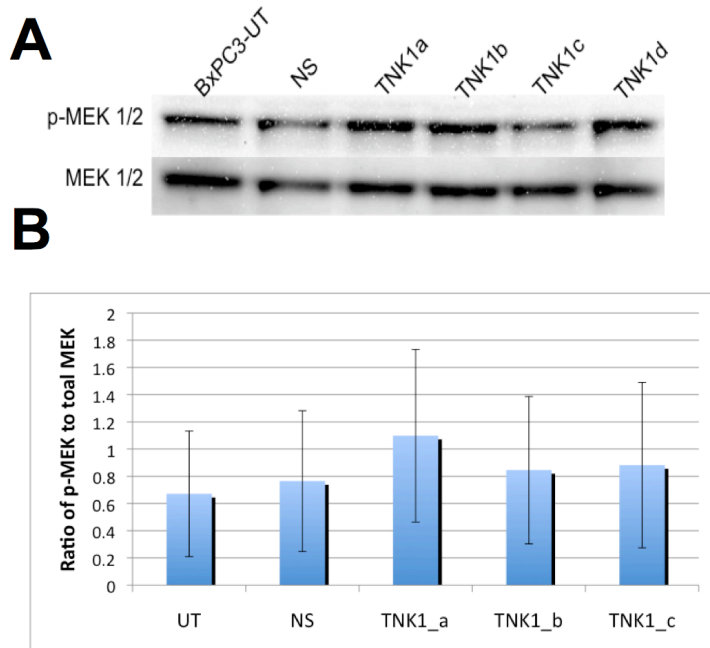

**SUPPLEMENTAL FIGURE S2. TNK1 knockdown does not affect phosphorylation of MEK1/2.** A, BxPC3 cells were treated with non-silencing or TNK1 siRNA for a total of 96 hours. Whole cell lysates were prepared and p-MEK1/2 (Ser217/221) expression was analyzed by western blotting along with levels of total MEK1/2. B, Densitometry analysis was completed to determine the ratio of p-MEK 1/2 (Ser217/221) to total MEK 1/2.

SUPPLEMENTAL FIGURE S3:

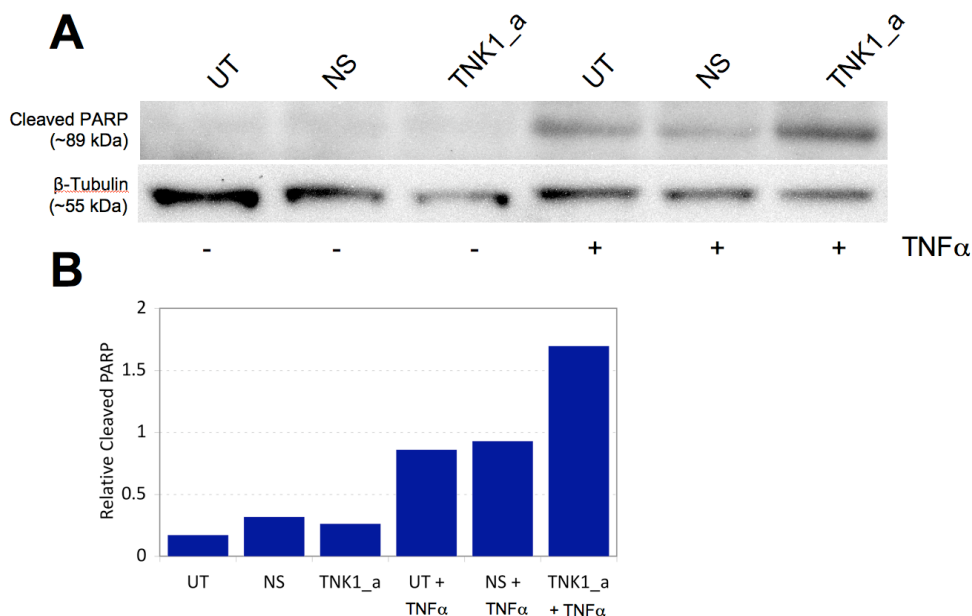

**SUPPLEMENTAL FIGURE S3. PARP cleavage in TNK1 siRNA- and TNF $\alpha$ -treated cells.**

A, BxPC3 cells were treated with non-silencing or TNK1 siRNA for a total of 96 hours. Samples were incubated with 20 ng/mL TNF $\alpha$  for 12 hours and whole cell lysates were analyzed for cleavage of PARP by western blotting. Protein expression of  $\beta$ -tubulin was completed to ensure appropriate loading of all lanes. B, Densitometry analysis graphically illustrates the increase in cleaved PARP expression. Units of measurement are expressed as the ratio of cleaved PARP to  $\beta$ -tubulin. UT: untreated, NS: non-silencing siRNA treated.
